# Supplementary material for: Cryo-EM structure of the yeast TREX complex and coordination with the SR-like protein Gbp2
Source: eLife journal article supplement (doi:10.7554/elife.65699), 2021-03-31
Supplement: supp [file elife_poa_e65699_Figure_4_figure_supplement_2.pdf › elife_poa_e65699_Figure_4_figure_supplement_2.pdf]

A 3D ribbon diagram of the THO complex. The structure is composed of several subunits, with some regions highlighted in different colors (blue, green, orange, purple) to represent different domains. A curved arrow points from the label "mobile" THO to a specific region of the complex, while the label "rigid" THO points to another region. The overall structure is complex and multi-domain.
