# Supplementary material for: Cryo-EM structure of the yeast TREX complex and coordination with the SR-like protein Gbp2
Source: eLife. 2021 Mar 31;10:e65699. doi: 10.7554/eLife.65699 (PMC8043747; doi:10.7554/eLife.65699)
Supplement: Supplementary file 2. [file elife-65699-supp2.xlsx]

## Sheet: THO-Gbp2-EDC
Table 2. 200 Unique EDC cross-linked peptides identified from THO-Gbp2 complex
Protein(residue)-protein(residue)	Unique cross-linked peptides	Modification	P value	Precursor Mass Error (ppm)	enzyme
THO2(52)-THP2(2)	TLCSDFTALESNDEKEDWLR(10)-TKEEGR(1)	Carbamidomethyl[C](3)	5.11e-15	1.46128	trypsin
THO2(1547)-THO2(1558)	NKFQTQDYR(2)-DSGAAHR(1)	null	1.26e-14	0.711233	trypsin
HPR1(558)-HPR1(566)	KPEGVYEAAQAKWESK(12)-ISSETSGGEAKDEIIR(4)	null	8.42e-14	2.24258	trypsin
MFT1(224)-THP2(242)	SDIENVRQEVSSYKEK(14)-SEINAPSESYPVDK(2)	null	1.09e-13	1.99583	trypsin
HPR1(681)-HPR1(667)	INSASQTEGDELK(11)-IKSQR(2)	null	2.97e-13	1.17962	trypsin
THO2(967)-THP2(261)	SLYDERKNALSGENTGHMSNR(7)-SEINAPSESYPVDKEGDIVLE(21)	null	1.02e-12	0.704982	trypsin
THP2(187)-MFT1(158)	AKFGLENK(2)-ELGTDLVK(1)	null	1.54e-12	1.40978	trypsin
THO2(1230)-HPR1(635)	NYETACQNEQK(3)-KLQDAR(1)	Carbamidomethyl[C](6)	2.89e-12	0.722334	trypsin
GBP2(147)-GBP2(190)	ELFGTVGEVVEADIITSK(8)-KLMVR(1)	null	4.8e-12	1.66273	trypsin
THO2(1547)-GBP2(241)	NKFQTQDYR(2)-ECGHVLR(1)	Carbamidomethyl[C](14)	1.03e-11	2.44516	trypsin
THP2(89)-THP2(2)	DVAAGVQNPK(1)-TKEEGR(1)	null	4.34e-11	0.374954	trypsin
HPR1(600)-HPR1(614)	VNEKTGVDGLFEEPR(4)-KVEALDDSFK(3)	null	4.34e-11	0.709675	trypsin
MFT1(90)-THP2(2)	KVADENWETCQQETLAK(8)-TKEEGR(1)	Carbamidomethyl[C](10)	1.46e-10	2.18412	trypsin
HPR1(604)-HPR1(612)	TGVDGLFEEPR(4)-KVEALDDSFK(1)	null	2.71e-10	1.54963	trypsin
THO2(983)-THP2(261)	KHLIQNQIK(1)-EGDIVLE(7)	null	3.29e-10	0.817773	trypsin
HPR1(434)-THO2(1490)	ENPLSDIDFENLDEVNK(6)-KNSSQR(1)	null	3.63e-10	1.26594	trypsin
THO2(1204)-THO2(1244)	DALELDEFCTLTEEEAEQK(7)-KQLELNK(1)	Carbamidomethyl[C](9)	1.14e-09	2.27821	trypsin
HPR1(609)-HPR1(612)	TGVDGLFEEPR(9)-KVEALDDSFK(1)	null	1.42e-09	1.53645	trypsin
HPR1(189)-HPR1(203)	LENNDILNTVK(2)-HYNMKYK(5)	null	2.21e-09	1.4818	trypsin
THO2(1502)-THO2(1490)	SQLRFPEKPFQEGK(7)-KNSSQR(1)	null	2.81e-09	1.00993	trypsin
TEX1(237)-TEX1(244)	SGYLAILKAK(8)-HGILEVCTK(5)	Carbamidomethyl[C](20)	3.55e-09	2.46143	trypsin
THP2(164)-MFT1(123)	LQGILEQYCAPDTDIR(12)-IGKLQGLYDSVQVINR(3)	Carbamidomethyl[C](9)	3.55e-09	0.668195	trypsin
THO2(1127)-HPR1(612)	KLYEWHSVITEQVIDLLSEK(11)-KVEALDDSFKEK(1)	null	4.08e-09	2.63691	trypsin
MFT1(87)-THO2(1576)	VADENWETCQQETLAK(4)-KSNTQALPQGPK(1)	Carbamidomethyl[C](9)	4.67e-09	1.31324	trypsin
TEX1(388)-MFT1(139)	DMFDNTMIEKR(10)-EVEGLSEGR(3)	null	6.09e-09	1.75588	trypsin
THP2(224)-THP2(231)	EWDDIEMLMFGDDAHSMK(12)-KMIQK(1)	null	1.21e-08	1.07495	trypsin
HPR1(566)-HPR1(600)	ISSETSGGEAKDEIIR(4)-VNEKTGVDGLFEEPR(4)	null	1.25e-08	-5.68506	trypsin
THO2(1457)-GBP2(241)	SKTYNDR(2)-ECGHVLR(1)	Carbamidomethyl[C](12)	1.44e-08	-0.756845	trypsin
THO2(1489)-TEX1(341)	LREEYKK(6)-TDPVLK(2)	null	3.23e-08	0.497864	trypsin
THO2(1322)-THO2(1244)	AISLVENDDETRNLR(6)-KQLELNK(1)	null	5.98e-08	0.003464	trypsin
THP2(49)-THP2(53)	SSDDLLTESLK(8)-KLPDLHR(1)	null	8.03e-08	1.03236	trypsin
THO2(1369)-THO2(1244)	TLIQNPQNPDFAEK(13)-KQLELNK(1)	null	8.74e-08	0.87104	trypsin
GBP2(140)-THO2(1576)	ELFGTVGEVVEADIITSK(1)-KSNTQALPQGPK(1)	null	1.01e-07	1.39735	trypsin
HPR1(654)-THO2(1244)	ALEEEASFPER(3)-KQLELNK(1)	null	1.09e-07	-0.114495	trypsin
THO2(377)-THO2(644)	DKISEETNADIESK(1)-SILKALSIDTIAK(4)	null	1.41e-07	1.31796	trypsin
HPR1(692)-THO2(1244)	GEISEENTK(2)-KQLELNK(1)	null	1.41e-07	1.00754	trypsin
THO2(55)-THP2(2)	TLCSDFTALESNDEK(13)-TKEEGR(1)	Carbamidomethyl[C](3)	1.59e-07	0.950163	trypsin
HPR1(656)-HPR1(667)	ALEEEASFPER(5)-IKSQR(2)	null	2.19e-07	1.06457	trypsin
THO2(1287)-THO2(1322)	NEPVIPTKPSSSQWSYSK(8)-AISLVENDDETR(6)	null	2.19e-07	0.986781	trypsin
HPR1(429)-THO2(1539)	ENPLSDIDFENLDEVNK(1)-FKKDETIR(2)	null	2.74e-07	2.02294	trypsin
HPR1(655)-HPR1(667)	ALEEEASFPEREQK(4)-IKSQR(2)	null	2.78e-07	1.56208	trypsin
HPR1(612)-HPR1(595)	KVEALDDSFK(1)-SRYLFDFDK(8)	null	2.92e-07	1.84275	trypsin
HPR1(596)-HPR1(609)	SRYLFDFDKVNEK(9)-TGVDGLFEEPR(9)	null	2.99e-07	2.98489	trypsin
THO2(382)-THO2(644)	DKISEETNADIESK(6)-SILKALSIDTIAK(4)	null	3.73e-07	1.48914	trypsin
THO2(1203)-THO2(1335)	DALELDEFCTLTEEEAEQK(6)-LSKQNMPIFDFR(3)	Carbamidomethyl[C](9)	4e-07	3.79608	trypsin
THO2(1536)-THO2(1542)	DSPSENEEKPNKR(12)-KDETIR(3)	null	4.17e-07	0.22138	trypsin
THO2(1388)-THO2(1335)	NISREPYPDTTSSYSEAAAPEYTK(9)-LSKQNMPIFDFR(3)	null	5.32e-07	0.661775	trypsin
THP2(193)-MFT1(194)	FGLENKYSLK(6)-IYDDFSK(4)	null	5.68e-07	1.11464	trypsin
HPR1(562)-HPR1(609)	WESKISSETSGGEAKDEIIR(4)-TGVDGLFEEPR(9)	null	6.49e-07	-1.18299	trypsin
HPR1(434)-THO2(1457)	ENPLSDIDFENLDEVNK(6)-SKTYNDR(2)	null	7.14e-07	2.73768	trypsin
HPR1(434)-THO2(1576)	ENPLSDIDFENLDEVNK(6)-KSNTQALPQGPK(1)	null	7.89e-07	-0.221255	trypsin
THO2(1448)-THO2(1490)	SELPTRPSK(2)-KNSSQR(1)	null	1e-06	-0.612274	trypsin
THO2(1127)-HPR1(621)	LYEWHSVITEQVIDLLSEK(10)-KVEALDDSFKEK(10)	null	1.14e-06	2.47027	trypsin
HPR1(599)-HPR1(612)	SRYLFDFDKVNEKTGVDGLFEEPR(12)-KVEALDDSFK(1)	null	1.47e-06	0.640964	trypsin
GBP2(269)-GBP2(190)	GFGSVIYPTEDEMIR(10)-KLMVR(1)	null	1.79e-06	0.373312	trypsin
MFT1(186)-MFT1(181)	DSSEERYR(4)-LVDPGLKK(7)	null	2.14e-06	0.843029	trypsin
HPR1(434)-THO2(1335)	ENPLSDIDFENLDEVNK(6)-LSKQNMPIFDFR(3)	null	2.31e-06	1.35653	trypsin
THO2(827)-THO2(1490)	LTSFFTDQSAISEIILLLYTLNLK(7)-KNSSQR(1)	null	3.13e-06	4.0678	trypsin
THO2(1576)-THO2(1567)	KSNTQALPQGPK(1)-ANENQR(3)	null	3.18e-06	1.12114	trypsin
THP2(53)-THP2(49)	KLPDLHRELINSSIR(1)-SSDDLLTESLK(8)	null	3.22e-06	1.13605	trypsin
HPR1(82)-HPR1(20)	FIIDSMTNAIEDEEENNLEK(11)-TFKALPVSFDSIR(3)	null	3.27e-06	3.73152	trypsin
THO2(1587)-HPR1(192)	SNTQALPQGPKGGNYVSR(11)-LENNDILNTVK(5)	null	3.36e-06	1.15423	trypsin
THO2(1567)-THO2(1576)	DSGAAHRANENQR(10)-KSNTQALPQGPK(1)	null	3.87e-06	1.37553	trypsin
HPR1(562)-HPR1(604)	WESKISSETSGGEAK(4)-TGVDGLFEEPR(4)	null	4.53e-06	2.21576	trypsin
THO2(644)-THO2(381)	SILKALSIDTIAK(4)-ISEETNADIESK(3)	null	4.62e-06	0.886055	trypsin
HPR1(436)-HPR1(423)	ENPLSDIDFENLDEVNK(8)-NFYKSCYLR(4)	Carbamidomethyl[C](26)	4.86e-06	3.12459	trypsin
THP2(85)-HPR1(233)	EAQLLEDTKTGRDVAAGVQNPK(9)-SASISALQESDNEWNR(9)	null	5.58e-06	0.475288	trypsin
HPR1(86)-HPR1(20)	RFIIDSMTNAIEDEEENNLEK(16)-TFKALPVSFDSIR(3)	null	7.56e-06	1.83184	trypsin
THP2(261)-THO2(960)	SEINAPSESYPVDKEGDIVLE(21)-LSLYDIHFDKSLYDERK(10)	null	8.84e-06	1.35586	trypsin
THO2(1490)-TEX1(341)	KNSSQR(1)-TDPVLK(2)	null	9.04e-06	-1.16918	trypsin
THO2(1539)-TEX1(341)	FKKDETIR(2)-TDPVLK(2)	null	9.82e-06	2.64504	trypsin
THP2(213)-THP2(235)	EWDDIEMLMFGDDAHSMKK(1)-MIQKIDSLK(4)	null	9.87e-06	1.3799	trypsin
GBP2(241)-GBP2(190)	ECGHVLR(1)-KLMVR(1)	Carbamidomethyl[C](2)	1.18e-05	0.843229	trypsin
HPR1(562)-HPR1(608)	WESKISSETSGGEAKDEIIR(4)-TGVDGLFEEPR(8)	null	1.89e-05	0.762562	trypsin
HPR1(297)-THO2(1490)	SLSPLLDAILEIEENFYSK(11)-KNSSQR(1)	null	2.21e-05	5.19973	trypsin
THP2(261)-THP2(231)	SEINAPSESYPVDKEGDIVLE(21)-KMIQK(1)	null	2.37e-05	0.18428	trypsin
HPR1(297)-THO2(1260)	SLSPLLDAILEIEENFYSK(11)-LQNDPPKSVASGSAGLNSK(7)	null	2.39e-05	1.88488	trypsin
HPR1(573)-HPR1(609)	ISSETSGGEAKDEIIRQWQTLR(11)-TGVDGLFEEPR(9)	null	2.42e-05	1.03189	trypsin
THP2(85)-MFT1(90)	EAQLLEDTKTGRDVAAGVQNPK(9)-VADENWETCQQETLAK(7)	Carbamidomethyl[C](34)	2.64e-05	1.87412	trypsin
MFT1(181)-MFT1(186)	LVDPGLKK(7)-DSSEER(4)	null	2.71e-05	0.909193	trypsin
MFT1(90)-THO2(1490)	KVADENWETCQQETLAK(8)-KNSSQR(1)	Carbamidomethyl[C](10)	3.06e-05	1.46638	trypsin
HPR1(656)-HPR1(650)	ALEEEASFPEREQK(5)-ERKKR(4)	null	3.35e-05	-0.348271	trypsin
HPR1(678)-HPR1(667)	INSASQTEGDELK(8)-IKSQR(2)	null	3.51e-05	0.749987	trypsin
HPR1(297)-TEX1(405)	SLSPLLDAILEIEENFYSK(11)-TSKNTDR(3)	null	3.58e-05	4.45279	trypsin
THO2(1434)-TEX1(341)	SAPKNIKPISSYAHKR(4)-TDPVLK(2)	null	3.76e-05	1.3957	trypsin
THO2(1576)-GBP2(121)	KSNTQALPQGPK(1)-NFENSIFVR(3)	null	4.22e-05	0.951059	trypsin
HPR1(608)-HPR1(623)	TGVDGLFEEPR(8)-EKLLYK(2)	null	4.26e-05	1.4127	trypsin
HPR1(544)-HPR1(547)	LINNVWKIPTGLDKIEQEVK(18)-KPEGVYEAAQAK(1)	null	4.5e-05	1.36383	trypsin
HPR1(600)-HPR1(574)	VNEKTGVDGLFEEPR(4)-DEIIR(1)	null	4.94e-05	1.52147	trypsin
HPR1(300)-HPR1(467)	SLSPLLDAILEIEENFYSK(14)-IKDPDFYR(2)	null	5.54e-05	3.67888	trypsin
THO2(1005)-THO2(1009)	HLIQNQIKDILVTGISHQRAFKK(22)-TSEFISEK(3)	null	5.78e-05	0.686341	trypsin
THO2(52)-THO2(1576)	TLCSDFTALESNDEKEDWLR(10)-KSNTQALPQGPK(1)	Carbamidomethyl[C](3)	6.16e-05	1.26781	trypsin
MFT1(87)-THO2(1490)	KVADENWETCQQETLAK(5)-KNSSQR(1)	Carbamidomethyl[C](10)	6.33e-05	0.933711	trypsin
MFT1(49)-MFT1(55)	LTGSIINGTLSNDDSK(13)-IEKLTEQNISQLK(3)	null	6.71e-05	1.43781	trypsin
HPR1(655)-HPR1(646)	ALEEEASFPEREQK(4)-IGKERK(3)	null	6.83e-05	1.50154	trypsin
GBP2(269)-GBP2(298)	GFGSVIYPTEDEMIR(10)-EGRFNKR(6)	null	6.83e-05	-1.20825	trypsin
THO2(1587)-GBP2(367)	SNTQALPQGPKGGNYVSR(11)-SDLFDLFGPIGK(5)	null	6.96e-05	2.82904	trypsin
MFT1(90)-THO2(1457)	VADENWETCQQETLAK(7)-SKTYNDR(2)	Carbamidomethyl[C](9)	7.21e-05	-0.180887	trypsin
GBP2(300)-GBP2(314)	KNNDRYNQR(1)-REDLEDTR(6)	null	8.19e-05	2.01704	trypsin
HPR1(297)-THO2(1576)	SLSPLLDAILEIEENFYSK(11)-KSNTQALPQGPK(1)	null	8.98e-05	4.01975	trypsin
THO2(1576)-TEX1(341)	KSNTQALPQGPK(1)-TDPVLK(2)	null	9.11e-05	0.691962	trypsin
THO2(201)-THO2(208)	KYNLLVENSVGYGQLVALLILAYYDPDNFSKVSAYLK(31)-EIYHIMGKYSLDSIR(1)	null	0.0001	3.84207	trypsin
THO2(1287)-MFT1(129)	NEPVIPTKPSSSQWSYSK(8)-LQGLYDSVQVINR(6)	null	0.000115	4.12065	trypsin
HPR1(566)-HPR1(558)	ISSETSGGEAKDEIIRQWQTLR(4)-KPEGVYEAAQAKWESK(12)	null	0.000122	1.23451	trypsin
THO2(1198)-MFT1(181)	DALELDEFCTLTEEEAEQKR(1)-LVDPGLKK(7)	Carbamidomethyl[C](9)	0.000124	1.96696	trypsin
THO2(1250)-HPR1(692)	QLELNKSQR(6)-GEISEENTK(2)	null	0.000127	1.78311	trypsin
THO2(1203)-THO2(1332)	DALELDEFCTLTEEEAEQKR(6)-KLSKQNMPIFDFR(1)	Carbamidomethyl[C](9)	0.000133	2.51106	trypsin
GBP2(121)-THO2(1490)	RNFENSIFVR(4)-KNSSQR(1)	null	0.000133	3.39771	trypsin
HPR1(329)-HPR1(307)	YSLEEALNTEYYANYDVMTPK(16)-IKMNNR(2)	null	0.000134	0.715477	trypsin
HPR1(600)-HPR1(595)	VNEKTGVDGLFEEPR(4)-SRYLFDFDK(8)	null	0.000173	0.784203	trypsin
MFT1(87)-THO2(1457)	VADENWETCQQETLAK(4)-SKTYNDR(2)	Carbamidomethyl[C](9)	0.000173	1.83686	trypsin
GBP2(269)-GBP2(300)	GFGSVIYPTEDEMIR(10)-RKNNDRYNQR(2)	null	0.000181	2.15433	trypsin
TEX1(41)-TEX1(412)	GNTSHIEDK(7)-IGKDRPSR(3)	null	0.000187	0.073823	trypsin
THO2(919)-THO2(1006)	DYLDNQLNSNENFSIDELIEGAEFSDVDLTK(11)-KTSEFISEK(1)	null	0.000188	0.76762	trypsin
GBP2(204)-GBP2(121)	QDNPPPEAAKEFSK(10)-RNFENSIFVR(4)	null	0.000188	2.31643	trypsin
THO2(827)-THO2(1576)	LTSFFTDQSAISEIILLLYTLNLK(7)-KSNTQALPQGPK(1)	null	0.000203	3.59737	trypsin
MFT1(87)-THO2(1547)	KVADENWETCQQETLAK(5)-NKFQTQDYR(2)	Carbamidomethyl[C](10)	0.000216	2.12969	trypsin
HPR1(546)-HPR1(549)	LINNVWKIPTGLDKIEQEVKK(20)-PEGVYEAAQAK(2)	null	0.000218	1.35717	trypsin
HPR1(665)-HPR1(692)	ALEEEASFPEREQKIK(14)-GEISEENTK(2)	null	0.000222	0.483498	trypsin
HPR1(600)-HPR1(593)	VNEKTGVDGLFEEPR(4)-SRYLFDFDK(6)	null	0.000247	2.22582	trypsin
THO2(1201)-THO2(1332)	DALELDEFCTLTEEEAEQKR(4)-KLSKQNMPIFDFR(1)	Carbamidomethyl[C](9)	0.000278	3.39771	trypsin
THO2(1369)-MFT1(174)	TLIQNPQNPDFAEK(13)-NYLKLVDPGLKK(4)	null	0.000291	0.572123	trypsin
THO2(1531)-THO2(1539)	DSPSENEEKPNKR(7)-FKKDETIR(2)	null	0.000305	1.59778	trypsin
HPR1(612)-HPR1(622)	KVEALDDSFK(1)-EKLLYK(1)	null	0.000343	1.24399	trypsin
HPR1(85)-HPR1(20)	FIIDSMTNAIEDEEENNLEK(14)-TFKALPVSFDSIR(3)	null	0.000345	2.08524	trypsin
GBP2(157)-GBP2(172)	ELFGTVGEVVEADIITSKGHHR(18)-NESVQDAISK(2)	null	0.000355	1.65995	trypsin
MFT1(182)-MFT1(177)	KDSSEERYR(1)-LVDPGLK(3)	null	0.000376	1.35836	trypsin
THO2(1322)-THO2(1489)	AISLVENDDETR(6)-LREEYKK(6)	null	0.000395	-0.632534	trypsin
HPR1(297)-MFT1(374)	SLSPLLDAILEIEENFYSK(11)-KLGGTTSDFSASSSVEEVK(1)	null	0.000424	3.38299	trypsin
TEX1(387)-HPR1(307)	DMFDNTMIEKR(9)-IKMNNR(2)	null	0.000426	1.301	trypsin
HPR1(235)-THO2(1457)	SASISALQESDNEWNR(11)-SKTYNDR(2)	null	0.000434	0.939641	trypsin
MFT1(36)-MFT1(29)	VTKLTGSIINGTLSNDDSKIEK(3)-VHYSEVDTPFNKYLDILGK(15)	null	0.000449	4.51017	trypsin
THP2(261)-THP2(197)	SEINAPSESYPVDKEGDIVLE(21)-YSLKER(4)	null	0.000472	0.957454	trypsin
THO2(1576)-THO2(1013)	KSNTQALPQGPK(1)-TSEFISEK(7)	null	0.000503	1.43689	trypsin
MFT1(86)-THO2(1576)	VADENWETCQQETLAK(3)-KSNTQALPQGPK(1)	Carbamidomethyl[C](9)	0.000561	0.970823	trypsin
HPR1(596)-HPR1(604)	SRYLFDFDKVNEK(9)-TGVDGLFEEPR(4)	null	0.000568	1.508	trypsin
THO2(1250)-GBP2(241)	QLELNKSQR(6)-ECGHVLR(1)	Carbamidomethyl[C](14)	0.000645	1.47787	trypsin
THO2(1322)-THO2(1457)	AISLVENDDETRNLR(6)-SKTYNDR(2)	null	0.000775	1.3268	trypsin
HPR1(203)-HPR1(189)	HYNMKYKLENFLSELLPINEESNFNR(5)-LENNDILNTVK(2)	null	0.000778	0.982151	trypsin
HPR1(434)-HPR1(423)	ENPLSDIDFENLDEVNK(6)-NFYKSCYLR(4)	Carbamidomethyl[C](26)	0.000814	3.60651	trypsin
GBP2(150)-GBP2(208)	ELFGTVGEVVEADIITSK(11)-EFSKK(4)	null	0.000826	2.06346	trypsin
THO2(381)-THO2(640)	DKISEETNADIESK(5)-EAKSILK(3)	null	0.000895	1.19963	trypsin
HPR1(655)-HPR1(649)	ALEEEASFPEREQK(4)-ERKKR(3)	null	0.000957	1.11387	trypsin
HPR1(621)-THO2(1021)	KVEALDDSFKEK(10)-DCGEDQIK(1)	Carbamidomethyl[C](17)	0.00106	2.19828	trypsin
THO2(1210)-HPR1(667)	DALELDEFCTLTEEEAEQK(13)-IKSQR(2)	Carbamidomethyl[C](9)	0.00122	1.26805	trypsin
MFT1(87)-THO2(1437)	KVADENWETCQQETLAK(5)-NIKPISSYAHK(3)	Carbamidomethyl[C](10)	0.00127	0.746815	trypsin
HPR1(392)-HPR1(396)	ESDDYTLRPTIMDISLSNTTCLYKQLTQEDDDYYR(32)-KQFILQLCFTTNLIRNLISSDETR(1)	Carbamidomethyl[C](21);Carbamidomethyl[C](46)	0.00128	0.379902	trypsin
THO2(1287)-THO2(1324)	NEPVIPTKPSSSQWSYSK(8)-AISLVENDDETR(8)	null	0.00139	1.24613	trypsin
MFT1(29)-MFT1(36)	TKVHYSEVDTPFNKYLDILGK(17)-VTKLTGSIINGTLSNDDSK(3)	null	0.00141	1.95498	trypsin
THP2(255)-THP2(197)	SEINAPSESYPVDKEGDIVLE(15)-YSLKER(4)	null	0.00143	0.392827	trypsin
THO2(1369)-HPR1(462)	TLIQNPQNPDFAEK(13)-VLKFYK(3)	null	0.00143	0.970214	trypsin
HPR1(654)-HPR1(667)	ALEEEASFPEREQK(3)-IKSQR(2)	null	0.0016	1.90755	trypsin
HPR1(612)-HPR1(593)	KVEALDDSFK(1)-YLFDFDK(4)	null	0.00183	1.95142	trypsin
HPR1(690)-HPR1(678)	SEQTQPKGEISEENTK(7)-INSASQTEGDELK(8)	null	0.0019	0.40535	trypsin
THO2(1369)-THO2(1489)	TLIQNPQNPDFAEK(13)-LREEYKK(6)	null	0.00214	1.44807	trypsin
HPR1(558)-HPR1(542)	KPEGVYEAAQAKWESK(12)-IEQEVK(2)	null	0.00217	0.426725	trypsin
MFT1(374)-THO2(1349)	KLGGTTSDFSASSSVEEVK(1)-NSTLEIFER(5)	null	0.00225	0.803382	trypsin
THP2(85)-THP2(89)	EAQLLEDTKTGR(9)-DVAAGVQNPK(1)	null	0.00229	0.535848	trypsin
THO2(1532)-THO2(1539)	DSPSENEEKPNKR(8)-FKKDETIR(2)	null	0.00231	1.59778	trypsin
HPR1(678)-HPR1(646)	INSASQTEGDELK(8)-IGKERK(3)	null	0.00238	0.735242	trypsin
THO2(1281)-THO2(1335)	NEPVIPTKPSSSQWSYSK(2)-LSKQNMPIFDFR(3)	null	0.00238	0.634301	trypsin
THO2(1547)-THO2(1349)	NKFQTQDYR(2)-NSTLEIFER(5)	null	0.00241	1.26511	trypsin
THO2(1349)-GBP2(190)	NSTLEIFER(5)-KLMVR(1)	null	0.0025	1.90213	trypsin
HPR1(562)-HPR1(553)	WESKISSETSGGEAKDEIIR(4)-KPEGVYEAAQAK(7)	null	0.00257	0.789983	trypsin
THP2(248)-THP2(205)	SEINAPSESYPVDK(8)-LSTLTKELNHWRK(6)	null	0.00268	1.25787	trypsin
THO2(1525)-THO2(1539)	DSPSENEEKPNKR(1)-FKKDETIRNK(2)	null	0.00274	0.409763	trypsin
THO2(1395)-THO2(1335)	NISREPYPDTTSSYSEAAAPEYTKR(16)-LSKQNMPIFDFR(3)	null	0.00281	-0.152232	trypsin
HPR1(593)-HPR1(612)	YLFDFDKVNEKTGVDGLFEEPR(4)-KVEALDDSFK(1)	null	0.00281	0.668897	trypsin
THO2(1536)-THO2(1541)	DSPSENEEKPNKR(12)-DETIR(1)	null	0.00285	0.372664	trypsin
THO2(475)-MFT1(197)	IDNGILAHKPR(2)-IYDDFSKGPK(7)	null	0.00344	0.564533	trypsin
MFT1(374)-HPR1(416)	KLGGTTSDFSASSSVEEVK(1)-NLISSDETR(6)	null	0.00344	1.80374	trypsin
THO2(1445)-THO2(1448)	NIKPISSYAHKR(11)-SELPTRPSK(2)	null	0.00363	1.42778	trypsin
THO2(955)-THO2(942)	LSLYDIHFDKSLYDERK(5)-ISKDLFTTFWR(3)	null	0.00371	0.867163	trypsin
THO2(1170)-THO2(1182)	AHIQLVYTTLEENLINEER(11)-EDIKLPSSALIGHLK(4)	null	0.00394	3.74496	trypsin
THO2(1225)-THO2(1244)	IREMELEEIK(8)-KQLELNK(1)	null	0.00405	2.40671	trypsin
THO2(1287)-THO2(1325)	NEPVIPTKPSSSQWSYSK(8)-AISLVENDDETR(9)	null	0.00416	1.39535	trypsin
MFT1(374)-TEX1(341)	KLGGTTSDFSASSSVEEVK(1)-TDPVLK(2)	null	0.00419	1.04131	trypsin
HPR1(553)-HPR1(546)	PEGVYEAAQAKWESK(6)-IPTGLDKIEQEVKK(13)	null	0.00422	1.66365	trypsin
HPR1(656)-HPR1(665)	ALEEEASFPER(5)-EQKIK(3)	null	0.0045	2.12765	trypsin
THO2(1349)-THO2(1489)	NSTLEIFER(5)-LREEYKK(6)	null	0.00471	1.76002	trypsin
THO2(983)-THP2(255)	KHLIQNQIK(1)-EGDIVLE(1)	null	0.00491	1.02075	trypsin
THP2(240)-MFT1(232)	IDSLKSEINAPSESYPVDK(5)-WLRDAEIFGK(6)	null	0.00507	-0.258791	trypsin
THO2(52)-THO2(1490)	TLCSDFTALESNDEKEDWLR(10)-KNSSQR(1)	Carbamidomethyl[C](3)	0.00522	1.36797	trypsin
THO2(1203)-HPR1(667)	DALELDEFCTLTEEEAEQK(6)-IKSQR(2)	Carbamidomethyl[C](9)	0.00531	-1.30032	trypsin
MFT1(374)-MFT1(143)	KLGGTTSDFSASSSVEEVK(1)-EVEGLSEGR(7)	null	0.00533	1.62369	trypsin
MFT1(86)-THO2(1547)	VADENWETCQQETLAK(3)-NKFQTQDYR(2)	Carbamidomethyl[C](9)	0.00626	1.26063	trypsin
MFT1(90)-THO2(1437)	VADENWETCQQETLAK(7)-NIKPISSYAHK(3)	Carbamidomethyl[C](9)	0.00645	2.18127	trypsin
THO2(1204)-THO2(1250)	DALELDEFCTLTEEEAEQK(7)-QLELNKSQR(6)	Carbamidomethyl[C](9)	0.00661	1.32656	trypsin
HPR1(596)-HPR1(608)	SRYLFDFDKVNEK(9)-TGVDGLFEEPR(8)	null	0.00663	1.57685	trypsin
THO2(634)-THO2(638)	LSQDILPLKVSFNKAER(14)-EAKSILKALSIDTIAK(1)	null	0.00678	1.66204	trypsin
THO2(827)-THO2(1587)	LTSFFTDQSAISEIILLLYTLNLK(7)-SNTQALPQGPKGGNYVSR(11)	null	0.00718	4.29884	trypsin
THO2(52)-THO2(1539)	TLCSDFTALESNDEKEDWLR(10)-FKKDETIR(2)	Carbamidomethyl[C](3)	0.00724	0.668475	trypsin
TEX1(65)-TEX1(339)	FTSTPITPNEILSLK(10)-SLANYKTDPVLK(6)	null	0.00741	2.78669	trypsin
HPR1(654)-HPR1(665)	ALEEEASFPER(3)-EQKIK(3)	null	0.00746	0.986357	trypsin
GBP2(314)-GBP2(190)	REDLEDTRGTEPGLAQDAAVHIDETAAK(6)-KLMVR(1)	null	0.00749	0.108365	trypsin
HPR1(542)-HPR1(547)	LINNVWKIPTGLDKIEQEVK(16)-KPEGVYEAAQAK(1)	null	0.00818	1.33833	trypsin
THO2(1203)-THO2(1244)	DALELDEFCTLTEEEAEQK(6)-KQLELNK(1)	Carbamidomethyl[C](9)	0.00821	2.54874	trypsin
THO2(1529)-THO2(1539)	DSPSENEEKPNKR(5)-FKKDETIR(2)	null	0.00875	1.11099	trypsin
THO2(1335)-GBP2(367)	LSKQNMPIFDFR(3)-SDLFDLFGPIGK(5)	null	0.00924	1.61985	trypsin
THO2(394)-THO2(386)	QKTQQDILLFGK(2)-ISEETNADIESK(8)	null	0.00989	2.10389	trypsin

## Sheet: THO-Gbp2-DSS
Table 2. 133 Unique DSS cross-linked peptides identified from THO-Gbp2 complex
Protein(residue)-protein(residue)	Unique cross-linked peptides	Modification	P value	Precursor Mass Error (ppm)	enzyme
MFT1(14)-HPR1(612)	TKVHYSEVDTPFNK(2)-KVEALDDSFK(1)	null	2.66768e-33	-1.06552	trypsin
HPR1(600)-HPR1(612)	VNEKTGVDGLFEEPR(4)-KVEALDDSFK(1)	null	9.30622e-28	1.82072	trypsin
THO2(991)-THO2(967)	HLIQNQIKDILVTGISHQR(8)-KNALSGENTGHMSNR(1)	null	1.83806e-26	-0.171454	trypsin
HPR1(596)-HPR1(612)	SRYLFDFDKVNEK(9)-KVEALDDSFK(1)	null	4.73448e-22	-1.92474	trypsin
HPR1(612)-HPR1(623)	KVEALDDSFK(1)-EKLLYK(2)	null	9.09725e-22	0.10518	trypsin
THO2(390)-THO2(634)	ISEETNADIESKGK(12)-VSFNKAER(5)	null	5.95236e-21	-1.37944	trypsin
THO2(1576)-THO2(1539)	KSNTQALPQGPK(1)-FKKDETIR(2)	null	1.7343e-20	0.594104	trypsin
THO2(1547)-THO2(1539)	NKFQTQDYR(2)-FKKDETIR(2)	null	1.04919e-19	0.387238	trypsin
THO2(394)-HPR1(494)	QKTQQDILLFGK(2)-IDGFKEFQNFR(5)	null	1.0977e-19	0.196174	trypsin
HPR1(467)-HPR1(307)	IKDPDFYR(2)-IKMNNR(2)	null	2.01258e-19	-0.741091	trypsin
THO2(1197)-THO2(1244)	LKDALELDEFCTLTEEEAEQK(2)-KQLELNK(1)	Carbamidomethyl[C](11)	4.6035e-19	0.71689	trypsin
THO2(1335)-THO2(1244)	LSKQNMPIFDFR(3)-KQLELNK(1)	null	5.80333e-18	0.585546	trypsin
THO2(1513)-THO2(1490)	DSSKANPYQASSYKR(4)-KNSSQR(1)	null	1.95023e-17	3.57704	trypsin
MFT1(349)-MFT1(374)	QGNNEETDKETGVIEEPDAVNDAEEADSDHSSR(9)-KLGGTTSDFSASSSVEEVK(1)	null	2.63306e-17	0.497213	trypsin
THO2(1227)-HPR1(635)	EMELEEIKNYETACQNEQK(8)-KLQDAR(1)	Carbamidomethyl[C](14)	1.82917e-16	0.251726	trypsin
THO2(1020)-THO2(942)	SNVWNKDCGEDQIK(6)-ISKDLFTTFWR(3)	Carbamidomethyl[C](8)	4.00427e-16	0.867869	trypsin
THO2(1513)-THO2(1503)	DSSKANPYQASSYKR(4)-SQLRFPEKPFQEGK(8)	null	6.24051e-16	0.793819	trypsin
THO2(1193)-HPR1(635)	LPSSALIGHLKAR(11)-KLQDAR(1)	null	7.08487e-16	-0.731291	trypsin
THO2(960)-THO2(967)	LSLYDIHFDKSLYDER(10)-KNALSGENTGHMSNR(1)	null	8.30337e-16	1.22916	trypsin
MFT1(14)-THO2(163)	TKVHYSEVDTPFNK(2)-HLLKK(4)	null	8.37676e-16	2.14357	trypsin
THO2(1238)-HPR1(635)	NYETACQNEQKQVALR(11)-KLQDAR(1)	Carbamidomethyl[C](6)	9.04364e-16	-0.104986	trypsin
THO2(1576)-THO2(1547)	KSNTQALPQGPK(1)-NKFQTQDYR(2)	null	9.45517e-16	-0.809108	trypsin
THO2(394)-THO2(634)	QKTQQDILLFGK(2)-VSFNKAER(5)	null	9.63268e-16	0.487159	trypsin
THO2(967)-MFT1(174)	KNALSGENTGHMSNR(1)-NYLKLVDPGLKK(4)	null	2.64263e-15	-0.370624	trypsin
MFT1(14)-THP2(72)	TKVHYSEVDTPFNK(2)-LRYDKYQTR(5)	null	4.66635e-15	1.20905	trypsin
THP2(205)-THP2(197)	LSTLTKELNHWRK(6)-YSLKER(4)	null	1.40958e-14	0.223967	trypsin
HPR1(467)-HPR1(462)	IKDPDFYR(2)-VLKFYK(3)	null	2.09801e-14	-0.474828	trypsin
HPR1(558)-HPR1(600)	KPEGVYEAAQAKWESK(12)-VNEKTGVDGLFEEPR(4)	null	4.04059e-14	-1.99352	trypsin
THO2(378)-THO2(634)	DKISEETNADIESK(2)-VSFNKAER(5)	null	4.16032e-14	0.236656	trypsin
THO2(1028)-HPR1(612)	DCGEDQIKIFLQNCVVPR(8)-KVEALDDSFK(1)	Carbamidomethyl[C](2);Carbamidomethyl[C](14)	1.58266e-13	-0.188521	trypsin
TEX1(412)-TEX1(405)	IGKDRPSR(3)-TSKNTDR(3)	null	1.87725e-13	-0.214096	trypsin
THO2(1014)-THO2(942)	TSEFISEKSNVWNK(8)-ISKDLFTTFWR(3)	null	1.99094e-13	0.75816	trypsin
THP2(152)-MFT1(200)	WVPSEKLQGILEQYCAPDTDIR(6)-GPKELESINASMK(3)	Carbamidomethyl[C](15)	3.05142e-13	2.48493	trypsin
HPR1(690)-HPR1(667)	SEQTQPKGEISEENTK(7)-IKSQR(2)	null	7.76251e-13	0.080441	trypsin
THO2(1533)-THO2(1540)	DSPSENEEKPNK(9)-KDETIR(1)	null	8.01333e-13	-0.577441	trypsin
THP2(152)-MFT1(157)	WVPSEKLQGILEQYCAPDTDIR(6)-AEWEKELGTDLVK(5)	Carbamidomethyl[C](15)	1.19533e-12	1.48603	trypsin
TEX1(99)-TEX1(371)	DASFDKSVEVYIPDCCGSDK(6)-NEKNLITYWK(3)	Carbamidomethyl[C](15);Carbamidomethyl[C](16)	2.21559e-12	0.220722	trypsin
THO2(1489)-THO2(1379)	LREEYKK(6)-YIKNISR(3)	null	3.14691e-12	0.50047	trypsin
THO2(967)-MFT1(170)	KNALSGENTGHMSNR(1)-FLIEKNYLK(5)	null	2.98362e-11	-0.730012	trypsin
HPR1(573)-HPR1(547)	ISSETSGGEAKDEIIR(11)-KPEGVYEAAQAK(1)	null	3.62095e-11	0.437239	trypsin
THO2(1238)-HPR1(667)	NYETACQNEQKQVALR(11)-IKSQR(2)	Carbamidomethyl[C](6)	4.18512e-11	0.09631	trypsin
THP2(240)-MFT1(242)	IDSLKSEINAPSESYPVDK(5)-ITSIFKEELLKR(6)	null	5.33152e-11	-1.97923	trypsin
THO2(675)-THO2(640)	LISTNPLASLVPAVKQIENYDK(15)-EAKSILK(3)	null	8.5509e-11	2.99861	trypsin
MFT1(174)-THP2(193)	NYLKLVDPGLKK(4)-FGLENKYSLK(6)	null	1.15934e-10	0.19974	trypsin
HPR1(650)-HPR1(646)	KRALEEEASFPER(1)-IGKERK(3)	null	3.79336e-10	-0.882142	trypsin
THO2(16)-THP2(52)	LNALSQKVIPPASPSQASILTEEVIR(7)-SSDDLLTESLKK(11)	null	8.70111e-10	0.863187	trypsin
THO2(1539)-THO2(1490)	FKKDETIR(2)-KNSSQR(1)	null	1.12329e-09	-0.047543	trypsin
MFT1(374)-THO2(1244)	KLGGTTSDFSASSSVEEVK(1)-KQLELNK(1)	null	2.75513e-09	-1.10566	trypsin
TEX1(388)-HPR1(467)	DMFDNTMIEKR(10)-IKDPDFYR(2)	null	2.90103e-09	-0.583346	trypsin
HPR1(494)-THO2(163)	IDGFKEFQNFR(5)-HLLKK(4)	null	3.37558e-09	-0.414945	trypsin
THP2(152)-THP2(187)	WVPSEKLQGILEQYCAPDTDIR(6)-AKFGLENK(2)	Carbamidomethyl[C](15)	3.95534e-09	1.44572	trypsin
HPR1(573)-HPR1(600)	ISSETSGGEAKDEIIR(11)-VNEKTGVDGLFEEPR(4)	null	8.45507e-09	-0.320568	trypsin
THO2(1260)-THO2(1238)	LQNDPPKSVASGSAGLNSK(7)-NYETACQNEQKQVALRK(11)	Carbamidomethyl[C](28)	1.16927e-08	-0.938329	trypsin
HPR1(540)-HPR1(547)	IPTGLDKIEQEVK(7)-KPEGVYEAAQAK(1)	null	2.2255e-08	0.870045	trypsin
THO2(1149)-THO2(853)	NGIEFMKHVTSVFPVVK(7)-ANTQNSHYKILSTR(9)	null	2.99811e-08	0.195573	trypsin
THO2(1287)-THO2(1244)	NEPVIPTKPSSSQWSYSK(8)-KQLELNK(1)	null	3.70536e-08	-0.246667	trypsin
MFT1(157)-THP2(187)	AEWEKELGTDLVK(5)-AKFGLENK(2)	null	5.30357e-08	0.338493	trypsin
THO2(1197)-THO2(1193)	LKDALELDEFCTLTEEEAEQKR(2)-LPSSALIGHLKAR(11)	Carbamidomethyl[C](11)	7.14048e-08	0.316522	trypsin
THP2(175)-MFT1(181)	GVDAQIKNYLDQIK(7)-LVDPGLKK(7)	null	7.78642e-08	-0.531501	trypsin
MFT1(123)-MFT1(116)	IGKLQGLYDSVQVINREVEGLSEGR(3)-SIHSKLLLR(5)	null	8.24561e-08	-1.23511	trypsin
HPR1(558)-HPR1(573)	KPEGVYEAAQAKWESK(12)-ISSETSGGEAKDEIIR(11)	null	9.28482e-08	-0.054797	trypsin
HPR1(467)-TEX1(405)	IKDPDFYR(2)-TSKNTDR(3)	null	1.46316e-07	-0.210238	trypsin
THP2(254)-THO2(991)	SEINAPSESYPVDKEGDIVLE(14)-HLIQNQIKDILVTGISHQR(8)	null	1.48988e-07	0.394708	trypsin
HPR1(600)-HPR1(623)	VNEKTGVDGLFEEPR(4)-EKLLYK(2)	null	1.77056e-07	-1.05404	trypsin
THO2(1503)-MFT1(116)	SQLRFPEKPFQEGK(8)-SIHSKLLLR(5)	null	2.64692e-07	-0.730319	trypsin
HPR1(533)-HPR1(522)	LINNVWKIPTGLDK(7)-KFTFIKMGNK(6)	null	4.54258e-07	1.55318	trypsin
THP2(205)-THO2(982)	LSTLTKELNHWRK(6)-KKHLIQNQIK(1)	null	5.82113e-07	-0.002655	trypsin
HPR1(573)-THO2(853)	ISSETSGGEAKDEIIR(11)-ANTQNSHYKILSTR(9)	null	4.37544e-06	0.162923	trypsin
MFT1(52)-MFT1(33)	LTGSIINGTLSNDDSKIEK(16)-YLDILGKVTK(7)	null	4.75933e-06	0.351176	trypsin
HPR1(562)-HPR1(547)	WESKISSETSGGEAKDEIIR(4)-KPEGVYEAAQAK(1)	null	5.00985e-06	1.28719	trypsin
MFT1(182)-THO2(1103)	KDSSEER(1)-LEKMR(3)	null	5.01486e-06	9.0568	trypsin
THO2(967)-MFT1(165)	SLYDERKNALSGENTGHMSNR(7)-ELGTDLVKFLIEK(8)	null	8.32616e-06	-0.109673	trypsin
THO2(1335)-THO2(1547)	LSKQNMPIFDFR(3)-NKFQTQDYR(2)	null	1.23197e-05	1.51743	trypsin
THO2(1503)-THO2(1523)	SQLRFPEKPFQEGK(8)-ANPYQASSYKR(10)	null	1.38349e-05	0.547776	trypsin
THO2(1403)-THO2(1415)	NISREPYPDTTSSYSEAAAPEYTKR(24)-YSGNAGGKDGYGSSNYRGPSNDR(8)	null	2.06888e-05	-0.851494	trypsin
THO2(425)-HPR1(516)	LLIHGCVIPVIHVLKQYPK(15)-EKIPPPAFDETFKK(13)	Carbamidomethyl[C](6)	2.81989e-05	1.12035	trypsin
HPR1(665)-THO2(1244)	RALEEEASFPEREQKIK(15)-KQLELNK(1)	null	3.90472e-05	0.264525	trypsin
TEX1(405)-HPR1(462)	TSKNTDR(3)-VLKFYK(3)	null	4.77994e-05	-1.7506	trypsin
THP2(85)-THP2(2)	EAQLLEDTKTGR(9)-TKEEGR(1)	null	5.69062e-05	0.256186	trypsin
THO2(1379)-THO2(1197)	YIKNISREPYPDTTSSYSEAAAPEYTK(3)-LKDALELDEFCTLTEEEAEQK(2)	Carbamidomethyl[C](41)	5.85027e-05	2.78566	trypsin
THO2(1547)-THP2(197)	NKFQTQDYR(2)-YSLKER(4)	null	6.08998e-05	-0.677274	trypsin
THO2(1197)-THO2(1287)	LKDALELDEFCTLTEEEAEQK(2)-NEPVIPTKPSSSQWSYSK(8)	Carbamidomethyl[C](11)	7.16669e-05	2.1263	trypsin
THO2(1415)-THO2(1335)	YSGNAGGKDGYGSSNYRGPSNDR(8)-LSKQNMPIFDFR(3)	null	7.60837e-05	-1.93925	trypsin
THO2(1117)-HPR1(612)	KLYEWHSVITEQVIDLLSEK(1)-KVEALDDSFK(1)	null	8.19418e-05	2.90324	trypsin
THO2(1533)-THO2(1539)	DSPSENEEKPNKR(9)-FKKDETIR(2)	null	0.000118286	-0.169419	trypsin
MFT1(374)-MFT1(14)	KLGGTTSDFSASSSVEEVK(1)-TKVHYSEVDTPFNK(2)	null	0.000121632	1.22922	trypsin
THO2(1536)-THO2(1540)	DSPSENEEKPNKR(12)-KDETIR(1)	null	0.000140429	-0.230212	trypsin
MFT1(200)-THP2(187)	GPKELESINASMK(3)-AKFGLENK(2)	null	0.000153035	1.42035	trypsin
TEX1(358)-TEX1(34)	SWYIMSGKNDTLSNHFVK(8)-YLQSTFSKGNTSHIEDKR(8)	null	0.000231961	0.963397	trypsin
THO2(1379)-THO2(1238)	YIKNISREPYPDTTSSYSEAAAPEYTK(3)-NYETACQNEQKQVALR(11)	Carbamidomethyl[C](36)	0.000235539	1.73428	trypsin
THO2(1513)-THO2(1547)	DSSKANPYQASSYKR(4)-NKFQTQDYR(2)	null	0.000283955	-0.920203	trypsin
THO2(1576)-THO2(1540)	KSNTQALPQGPK(1)-FKKDETIR(3)	null	0.00030014	2.43374	trypsin
HPR1(573)-HPR1(612)	ISSETSGGEAKDEIIR(11)-KVEALDDSFK(1)	null	0.000300612	3.06157	trypsin
THO2(682)-THO2(640)	QIENYDKVSELVVYTTK(7)-EAKSILK(3)	null	0.000301611	1.0245	trypsin
MFT1(14)-THO2(378)	TKVHYSEVDTPFNK(2)-DKISEETNADIESK(2)	null	0.000307641	-1.27698	trypsin
HPR1(546)-HPR1(573)	IEQEVKKPEGVYEAAQAK(6)-ISSETSGGEAKDEIIR(11)	null	0.000376002	1.08113	trypsin
THO2(1287)-THO2(1238)	NEPVIPTKPSSSQWSYSK(8)-NYETACQNEQKQVALR(11)	Carbamidomethyl[C](27)	0.000396491	0.984723	trypsin
THO2(1287)-HPR1(467)	NEPVIPTKPSSSQWSYSK(8)-IKDPDFYR(2)	null	0.000449781	-1.75967	trypsin
MFT1(52)-THO2(148)	LTGSIINGTLSNDDSKIEK(16)-FSWISSKLLNK(7)	null	0.000478751	2.16286	trypsin
THO2(1238)-THO2(1576)	NYETACQNEQKQVALR(11)-KSNTQALPQGPK(1)	Carbamidomethyl[C](6)	0.000531492	4.72736	trypsin
THO2(1547)-THO2(1540)	NKFQTQDYR(2)-KDETIR(1)	null	0.000566272	0.49951	trypsin
TEX1(405)-THP2(197)	TSKNTDR(3)-YSLKER(4)	null	0.00056904	1.10382	trypsin
THO2(378)-TEX1(405)	DKISEETNADIESK(2)-TSKNTDR(3)	null	0.000621744	0.134793	trypsin
THO2(1379)-THO2(1244)	YIKNISR(3)-KQLELNK(1)	null	0.000811544	-0.188639	trypsin
THO2(1197)-THO2(1260)	LKDALELDEFCTLTEEEAEQK(2)-LQNDPPKSVASGSAGLNSK(7)	Carbamidomethyl[C](11)	0.000837342	0.907218	trypsin
TEX1(283)-THO2(463)	NFITGSIDGNCYVWNMKSLCCELIINDLNSAVTTLDVCHLGK(17)-VFEYLLNPLYTSMTSSGESKDMATALMITR(20)	Carbamidomethyl[C](11);Carbamidomethyl[C](20);Carbamidomethyl[C](21);Carbamidomethyl[C](38)	0.000935513	-2.14392	trypsin
THO2(1489)-THO2(1457)	LREEYKK(6)-SKTYNDR(2)	null	0.00106054	-0.557897	trypsin
MFT1(374)-THO2(1576)	KLGGTTSDFSASSSVEEVK(1)-KSNTQALPQGPK(1)	null	0.001065	0.546976	trypsin
THP2(98)-MFT1(104)	DVAAGVQNPKSISEYYSTFEHLNRDTLR(10)-LENLKDKLPDIK(5)	null	0.00112193	-0.621769	trypsin
THO2(1238)-HPR1(690)	NYETACQNEQKQVALR(11)-SEQTQPKGEISEENTK(7)	Carbamidomethyl[C](6)	0.00114825	-0.119676	trypsin
HPR1(573)-HPR1(546)	ISSETSGGEAKDEIIRQWQTLR(11)-IEQEVKKPEGVYEAAQAK(6)	null	0.00128113	0.303538	trypsin
THO2(1335)-TEX1(412)	LSKQNMPIFDFR(3)-IGKDRPSR(3)	null	0.00142886	0.436876	trypsin
TEX1(99)-TEX1(339)	DASFDKSVEVYIPDCCGSDK(6)-SLANYKTDPVLK(6)	Carbamidomethyl[C](15);Carbamidomethyl[C](16)	0.00208602	3.60608	trypsin
MFT1(374)-THO2(1587)	KLGGTTSDFSASSSVEEVK(1)-SNTQALPQGPKGGNYVSR(11)	null	0.00211321	0.524879	trypsin
THO2(1197)-THO2(1238)	LKDALELDEFCTLTEEEAEQK(2)-NYETACQNEQKQVALR(11)	Carbamidomethyl[C](11);Carbamidomethyl[C](30)	0.00261863	2.34144	trypsin
THO2(1587)-THO2(1490)	SNTQALPQGPKGGNYVSR(11)-KNSSQR(1)	null	0.00263343	-0.697702	trypsin
THO2(1197)-THO2(1547)	LKDALELDEFCTLTEEEAEQK(2)-NKFQTQDYR(2)	Carbamidomethyl[C](11)	0.00269647	2.33353	trypsin
MFT1(374)-THO2(1238)	KLGGTTSDFSASSSVEEVK(1)-NYETACQNEQKQVALR(11)	Carbamidomethyl[C](28)	0.00280065	-1.37459	trypsin
MFT1(374)-THO2(1260)	KLGGTTSDFSASSSVEEVK(1)-LQNDPPKSVASGSAGLNSK(7)	null	0.00300428	2.66567	trypsin
THO2(1403)-THO2(1238)	NISREPYPDTTSSYSEAAAPEYTKR(24)-NYETACQNEQKQVALR(11)	Carbamidomethyl[C](34)	0.00337833	7.16492	trypsin
THO2(1415)-THO2(1437)	YSGNAGGKDGYGSSNYRGPSNDR(8)-NIKPISSYAHK(3)	null	0.00338375	0.785417	trypsin
THO2(1547)-TEX1(405)	NKFQTQDYR(2)-TSKNTDR(3)	null	0.00426508	-0.890155	trypsin
THP2(193)-MFT1(170)	FGLENKYSLK(6)-FLIEKNYLK(5)	null	0.00440211	0.700252	trypsin
THO2(1287)-THO2(1547)	NEPVIPTKPSSSQWSYSK(8)-NKFQTQDYR(2)	null	0.0044834	-1.24212	trypsin
THO2(1415)-THO2(1547)	YSGNAGGKDGYGSSNYRGPSNDR(8)-NKFQTQDYR(2)	null	0.00472379	0.77967	trypsin
MFT1(374)-TEX1(405)	KLGGTTSDFSASSSVEEVK(1)-TSKNTDR(3)	null	0.00483388	5.19496	trypsin
THO2(1509)-THO2(1490)	PFQEGKDSSK(6)-KNSSQR(1)	null	0.00486065	0.069733	trypsin
THO2(1238)-THO2(1250)	NYETACQNEQKQVALRK(11)-QLELNKSQR(6)	Carbamidomethyl[C](6)	0.00490072	-1.10751	trypsin
THO2(1457)-TEX1(405)	SKTYNDR(2)-TSKNTDR(3)	null	0.00539963	-1.72702	trypsin
THO2(1415)-THO2(1490)	YSGNAGGKDGYGSSNYRGPSNDR(8)-KNSSQR(1)	null	0.0069155	0.94422	trypsin
HPR1(171)-MFT1(14)	MNTSVEPVSLGESNLISYKQPLYEK(19)-TKVHYSEVDTPFNK(2)	null	0.00824786	2.38251	trypsin
THO2(967)-THO2(991)	SLYDERKNALSGENTGHMSNR(7)-HLIQNQIKDILVTGISHQR(8)	null	0.00847259	3.31161	trypsin
THO2(1587)-HPR1(307)	SNTQALPQGPKGGNYVSR(11)-IKMNNR(2)	null	0.00974566	4.41603	trypsin
