# Supplementary figures and images for: Cryo-EM structure of the yeast TREX complex and coordination with the SR-like protein Gbp2
Source: eLife journal article supplement (doi:10.7554/elife.65699), 2021-03-31

**A**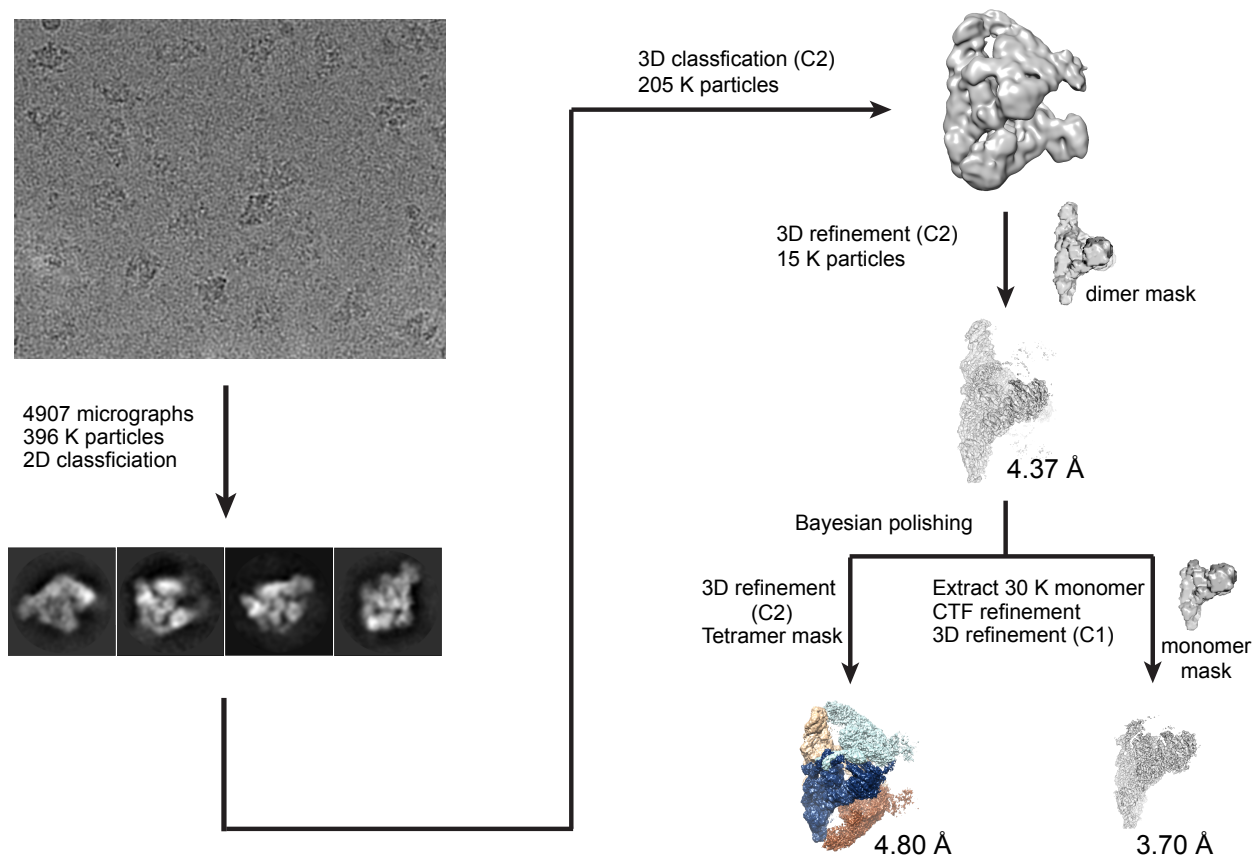**B**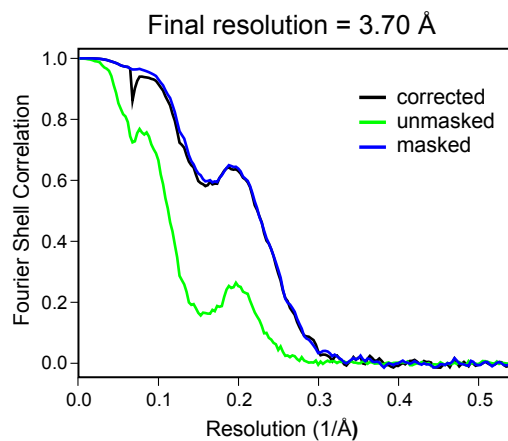

Supplement: supp [file elife_poa_e65699_Figure_2_figure_supplement_1.pdf › elife_poa_e65699_Figure_2_figure_supplement_1.pdf]

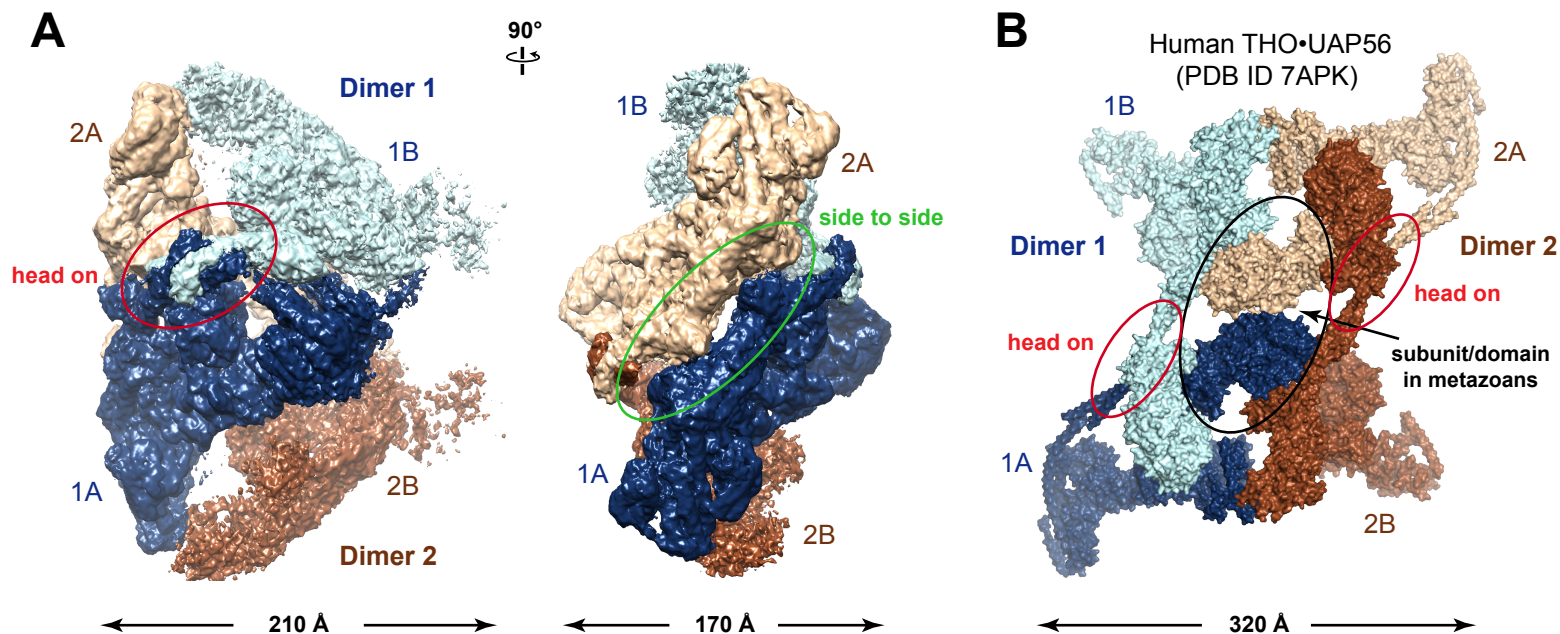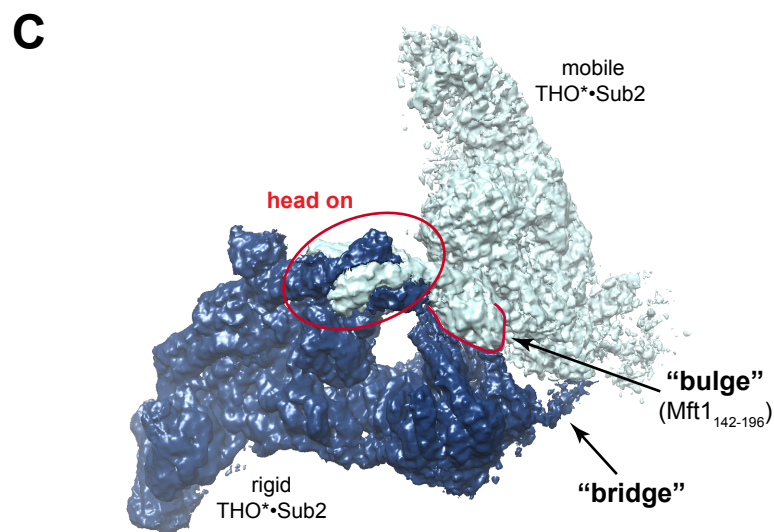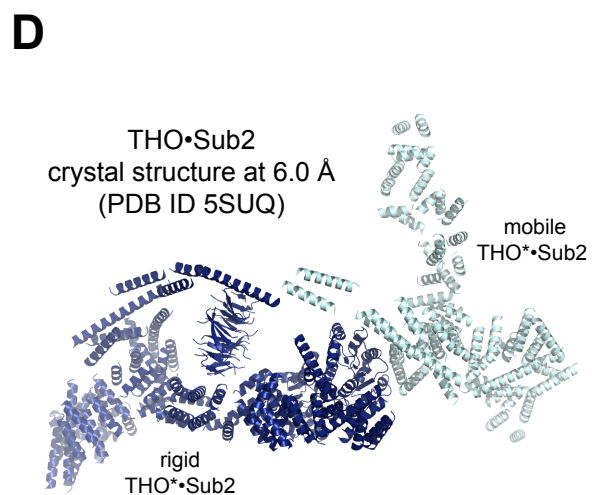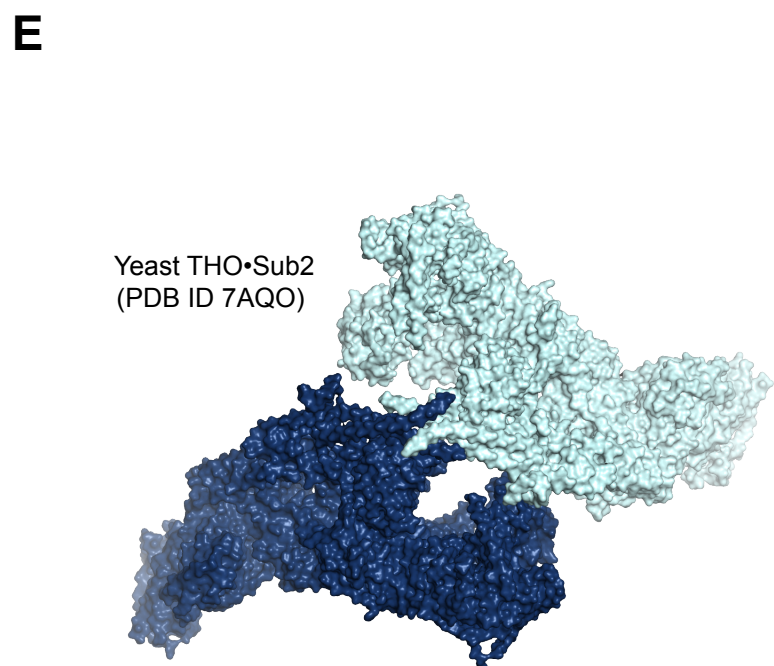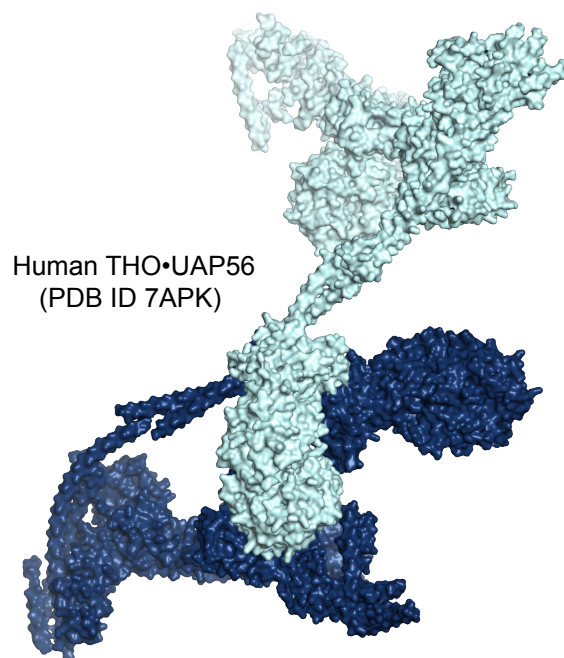

Supplement: supp [file elife_poa_e65699_Figure_2_figure_supplement_2.pdf › elife_poa_e65699_Figure_2_figure_supplement_2.pdf]

**A**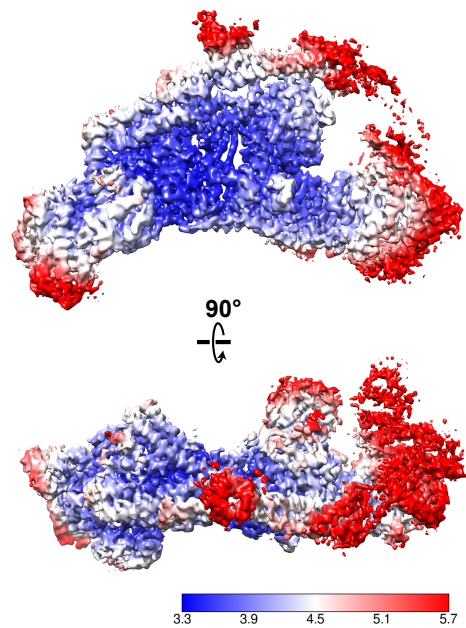**B**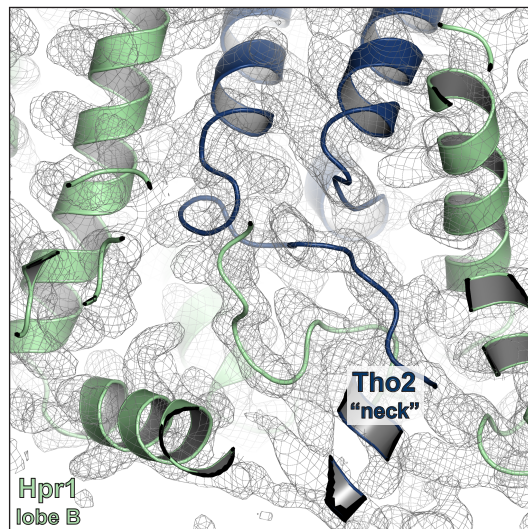**C**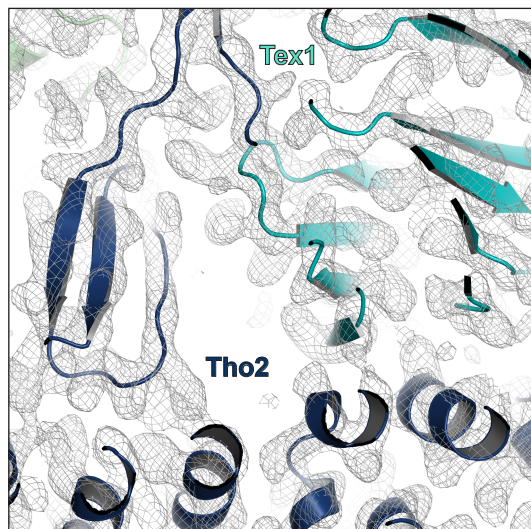**D**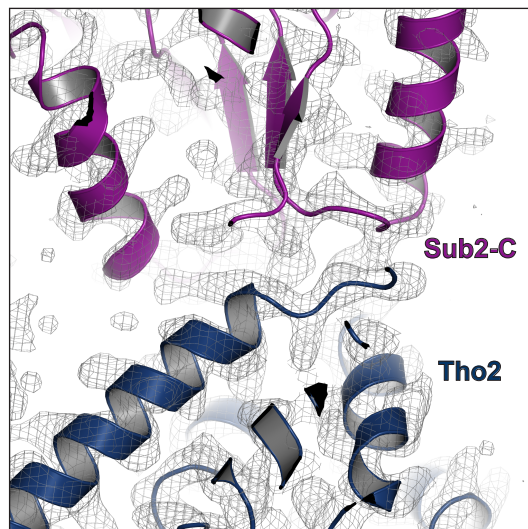

Supplement: supp [file elife_poa_e65699_Figure_2_figure_supplement_3.pdf › elife_poa_e65699_Figure_2_figure_supplement_3.pdf]

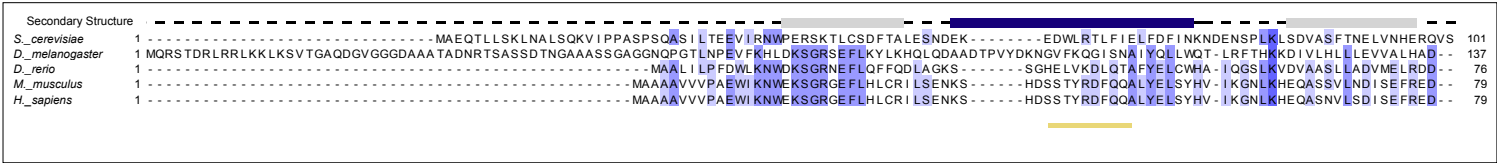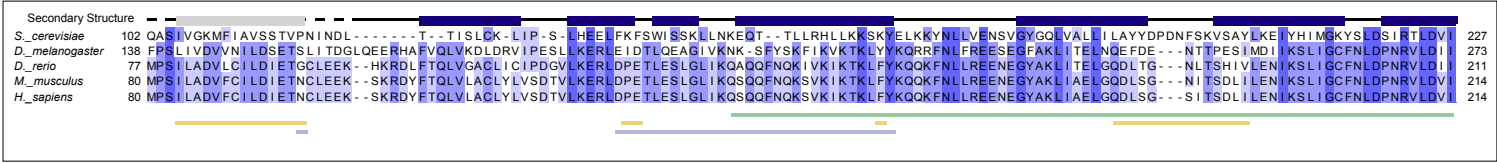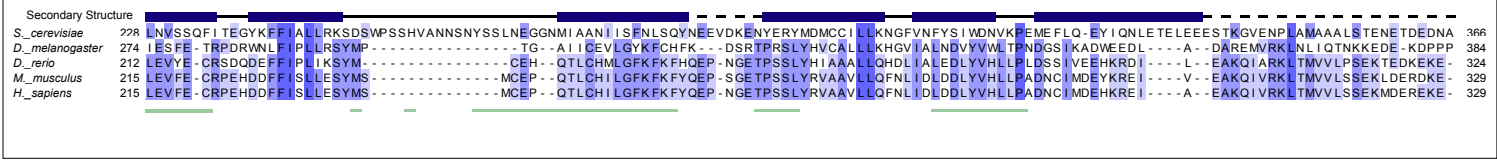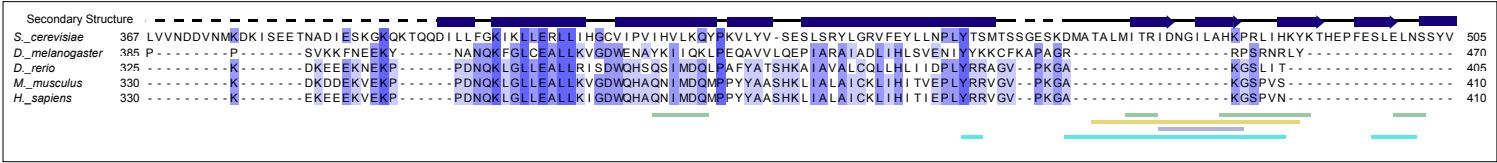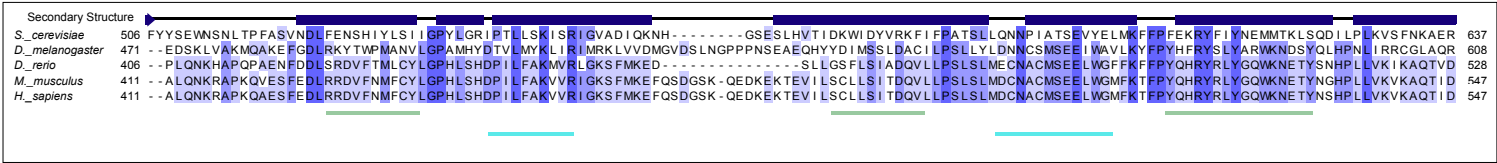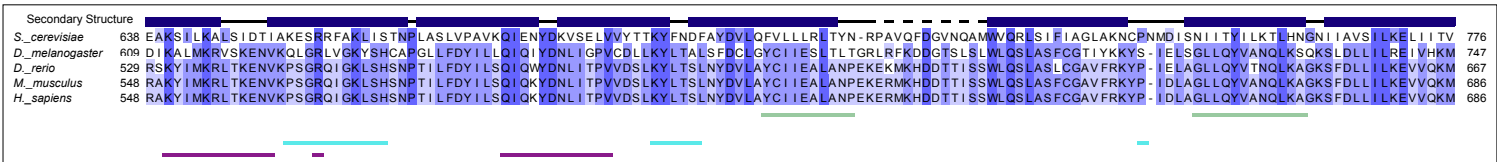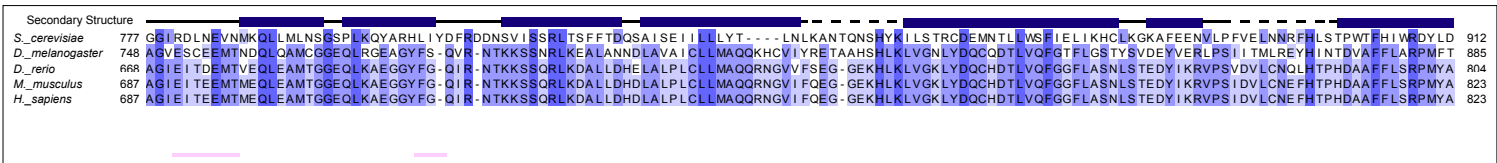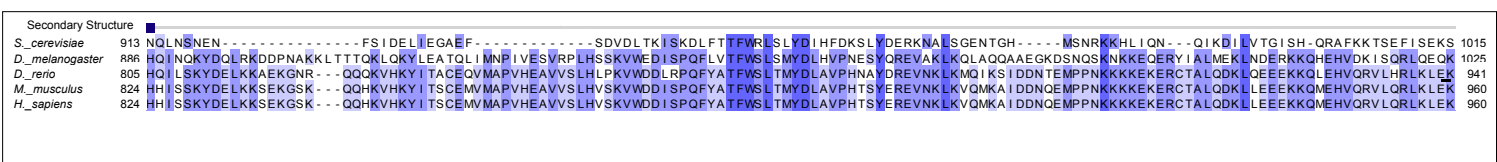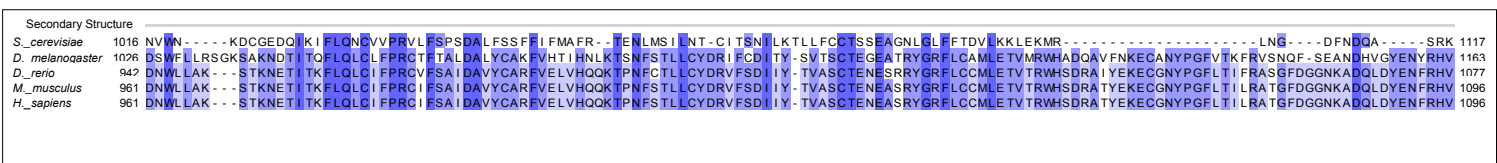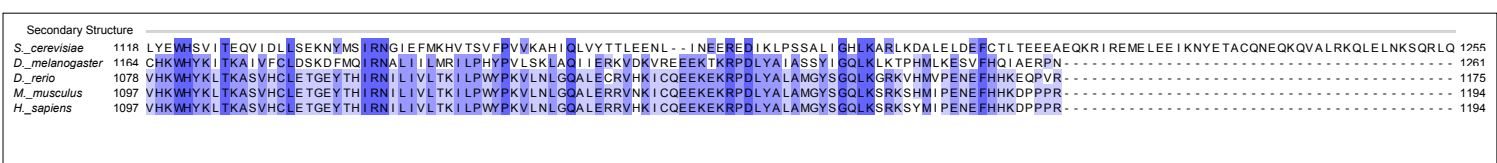

Supplement: supp [file elife_poa_e65699_Figure_2_figure_supplement_4.pdf › elife_poa_e65699_Figure_2_figure_supplement_4.pdf]

**Sub2-C (cryo-EM)**

Sub2-C (5SUQ)

**Sub2-N (cryo-EM)**

Sub2-N (5SUQ)

**Tho2 (cryo-EM)**

Tho2 (5SUQ)

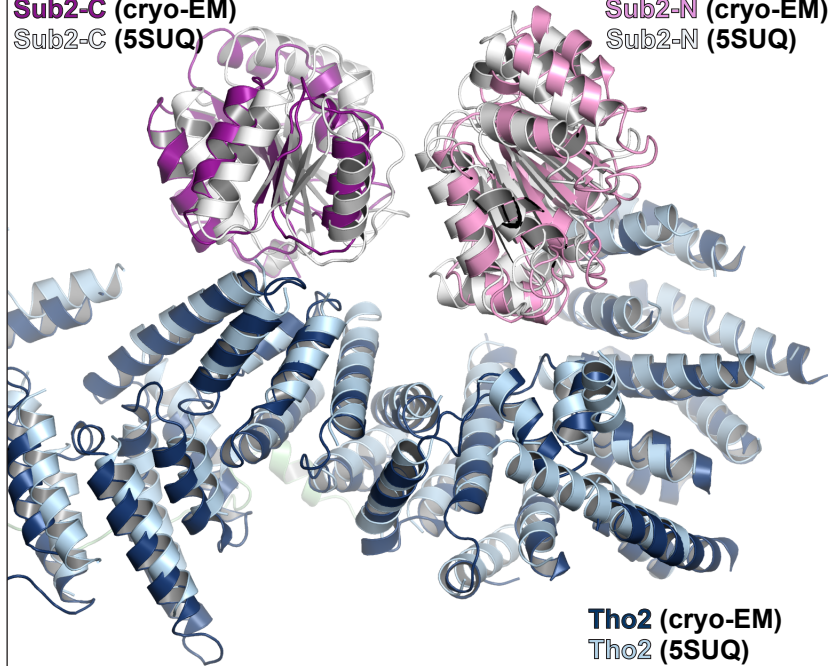

Supplement: supp [file elife_poa_e65699_Figure_3_figure_supplement_1.pdf › elife_poa_e65699_Figure_3_figure_supplement_1.pdf]

**A**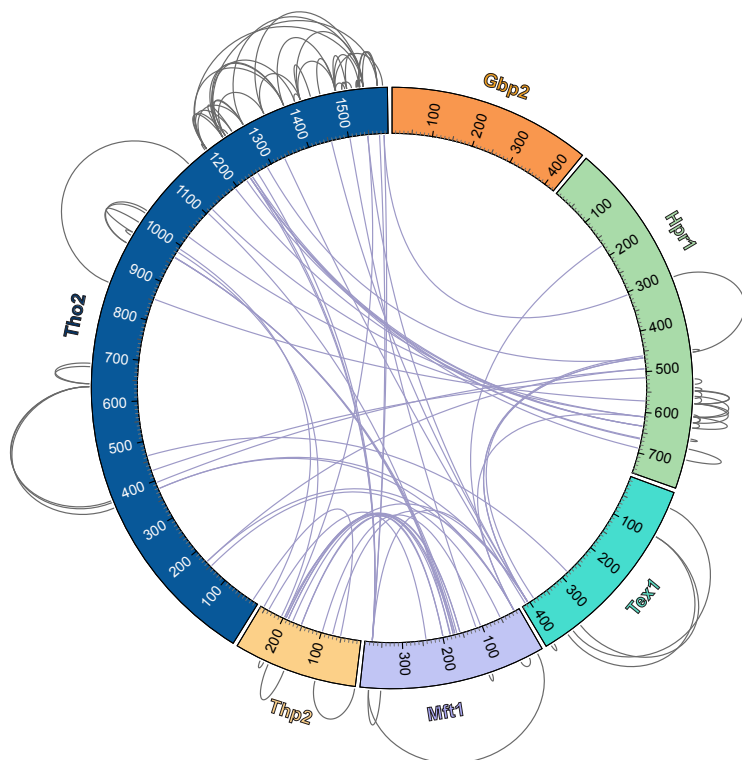**B**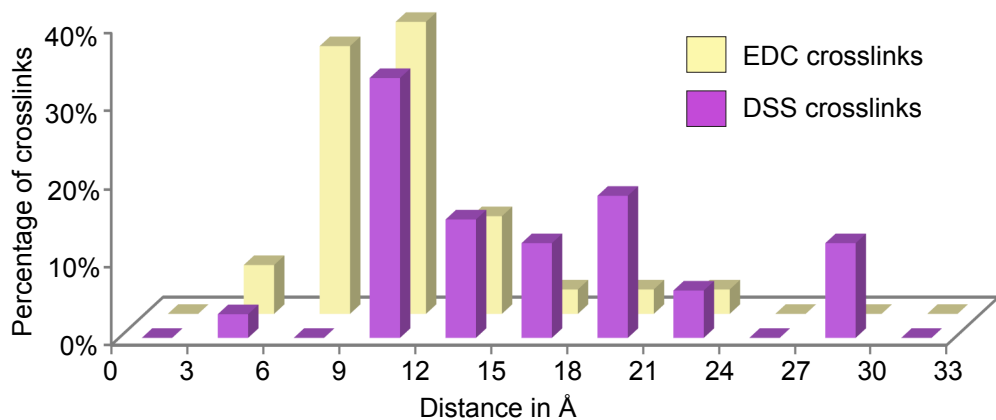**C**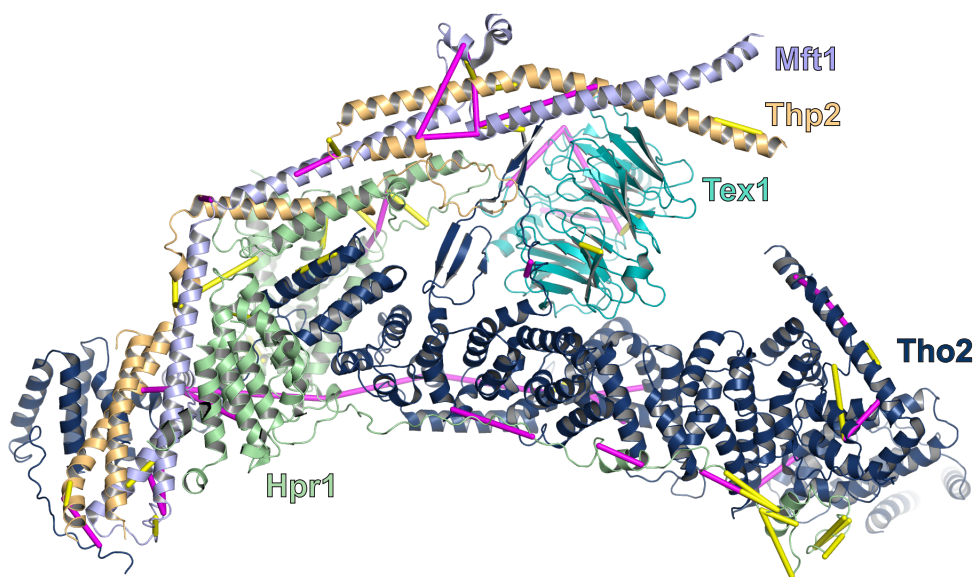

Supplement: supp [file elife_poa_e65699_Figure_4_figure_supplement_1.pdf › elife_poa_e65699_Figure_4_figure_supplement_1.pdf]

|          | Input |   |   | GST pull-down |   |   |
|----------|-------|---|---|---------------|---|---|
| GST-Gbp2 | +     | + | + | +             | + | + |
| THO-FL   | -     | - | + | -             | - | + |
| Sub2     | -     | + | + | -             | + | + |

kDa

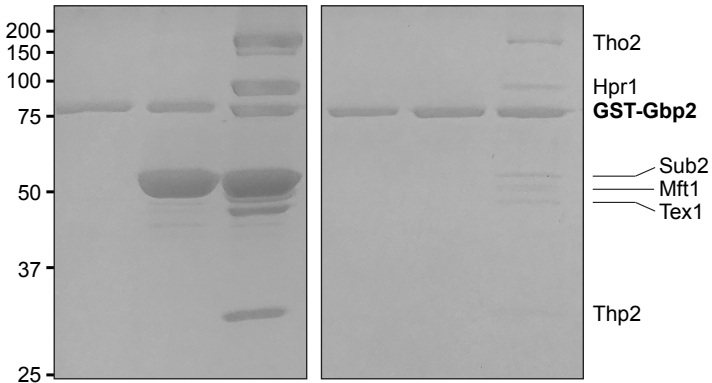

Supplement: supp [file elife_poa_e65699_Figure_4_figure_supplement_3.pdf › elife_poa_e65699_Figure_4_figure_supplement_3.pdf]

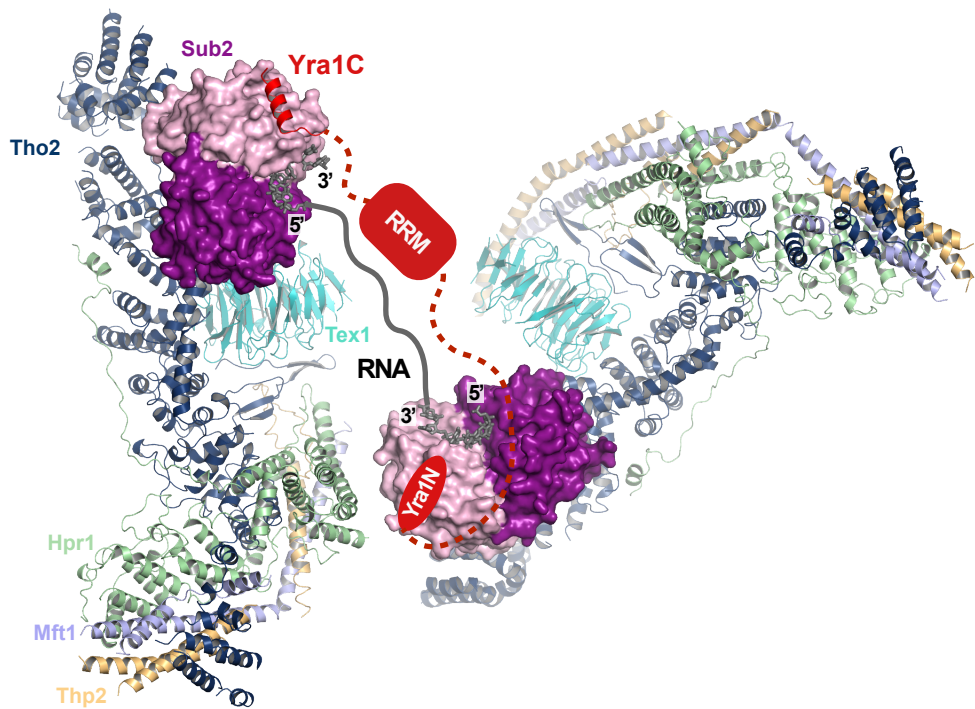

Supplement: supp [file elife_poa_e65699_Figure_5_figure_supplement_1.pdf › elife_poa_e65699_Figure_5_figure_supplement_1.pdf]
